# Supplementary material
Source: publisher figshare collection journal article supplement (https://karger.figshare.com/ndownloader/files/23100023)
Supplement: Supplementary file 1 [file 23100023]

**Table S3** Quality assessment of the included studies.

| **Study** | **Randomization** | |  | **Masking** | | **Accountability of all patients** | **Quality (score)** |
| --- | --- | --- | --- | --- | --- | --- | --- |
| **Randomization sequence** | **Methods of allocation** |  | **Double blind** | **Appropriate methods** |
| 2010 Ajani[8] | ★ | ★ |  | ★ |  | ★ | 4 |
| 2013 Ajani[10] |  |  |
| 2011 Li[13] | ★ |  |  | ★ |  | ★ | 3 |
| 2015 Li[11] | ★ | ★ |  | ★ | ★ | ★ | 5 |
| 2015 Shen[14] | ★ |  |  | ★ |  | ★ | 3 |
| 2017 Ajani[12] | ★ | ★ |  | ★ | ★ | ★ | 5 |
